# Supplementary material
Source: PubMed Central journal article supplement (PMC5385618)
Supplement: cr201742x5.pdf [file cr201742x5.pdf]

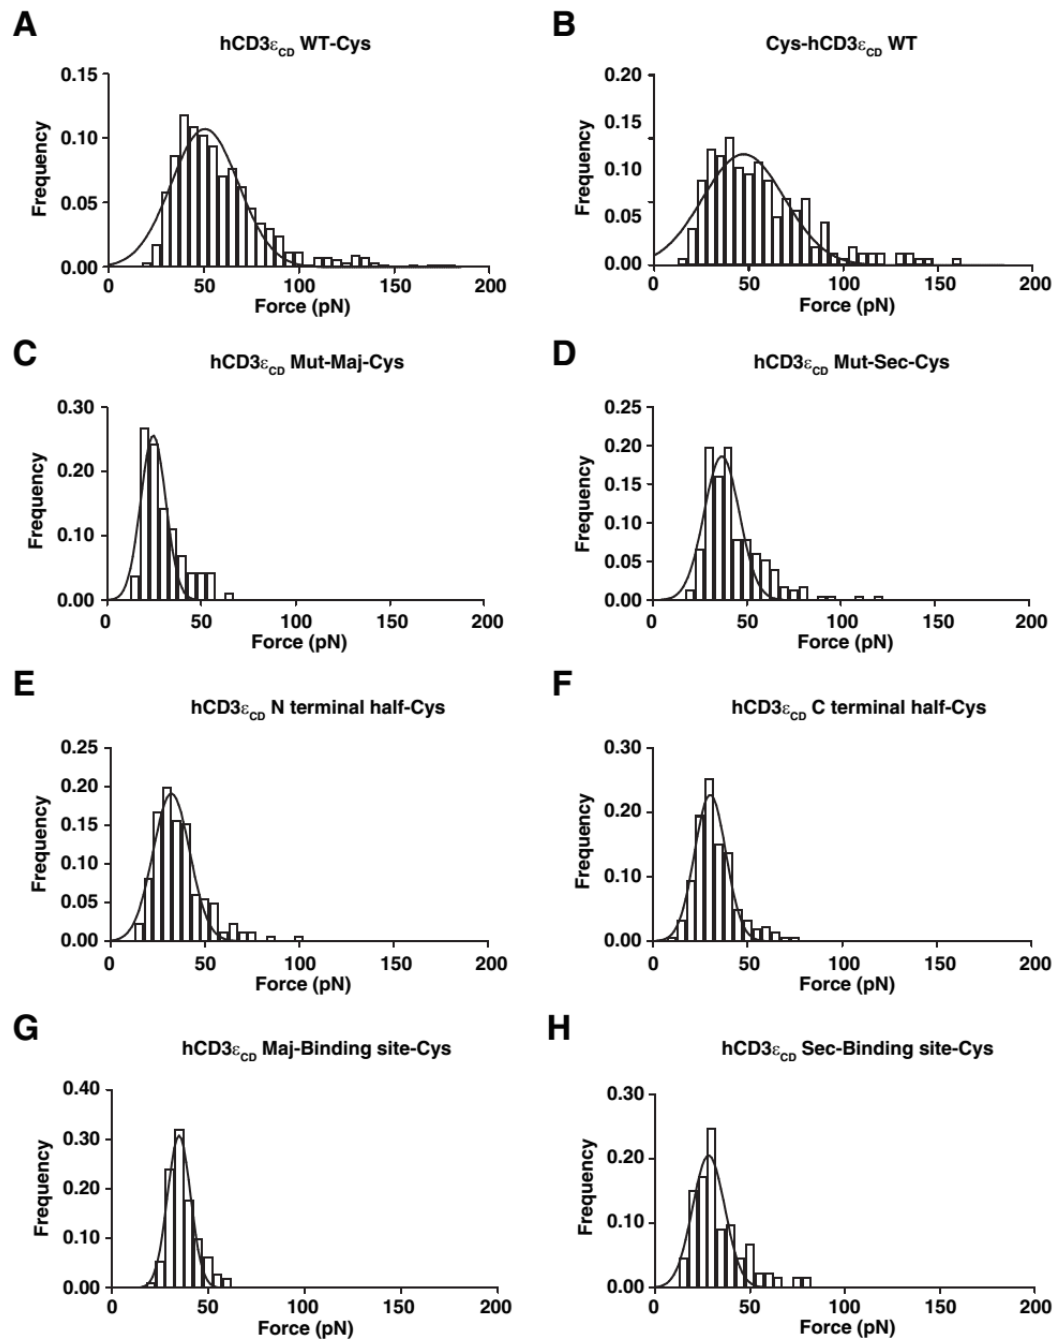

**Figure S5** Histograms of the rupture force values obtained for peptides shown in Figure 3F, respectively.  $n = 707, 209, 191, 233, 186, 227, 113, 134$  for hCD3 $\epsilon_{CD}$  WT-Cys (A), Cys-hCD3 $\epsilon_{CD}$  WT (B), hCD3 $\epsilon_{CD}$  Mut-Maj-Cys (C), hCD3 $\epsilon_{CD}$  Mut-Sec-Cys (D), hCD3 $\epsilon_{CD}$  N terminal half-Cys (E), hCD3 $\epsilon_{CD}$  C terminal half-Cys (F), hCD3 $\epsilon_{CD}$  Maj-Binding site-Cys (G) and hCD3 $\epsilon_{CD}$  Sec-Binding site-Cys (H), respectively.
