# Supplementary material
Source: PubMed Central journal article supplement (PMC5385618)
Supplement: cr201742x6.pdf [file cr201742x6.pdf]

**A**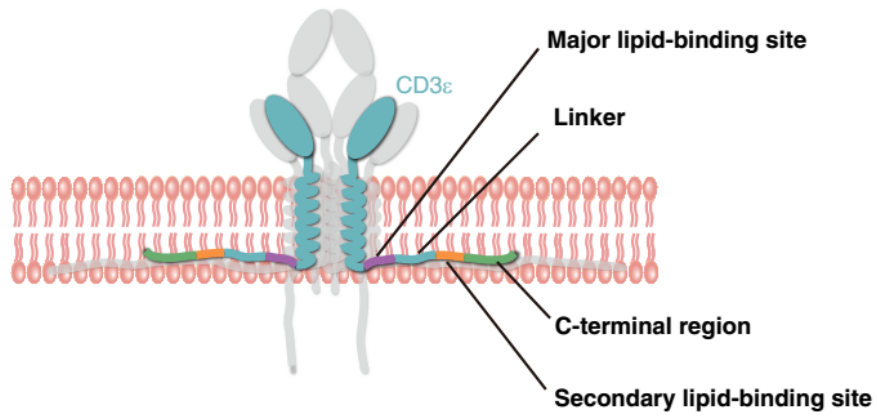**B**

| Conformational state                                    | I  | M1  | II  | M2  | III |
|---------------------------------------------------------|----|-----|-----|-----|-----|
| Major lipid-binding site (BRS)                          | on | on  | on  | on  | off |
| Linker                                                  | on | on  | on  | off | off |
| Secondary lipid-binding site (PRS + proximal half ITAM) | on | on  | off | off | off |
| C-terminal region (distal half ITAM)                    | on | off | off | off | off |

**C**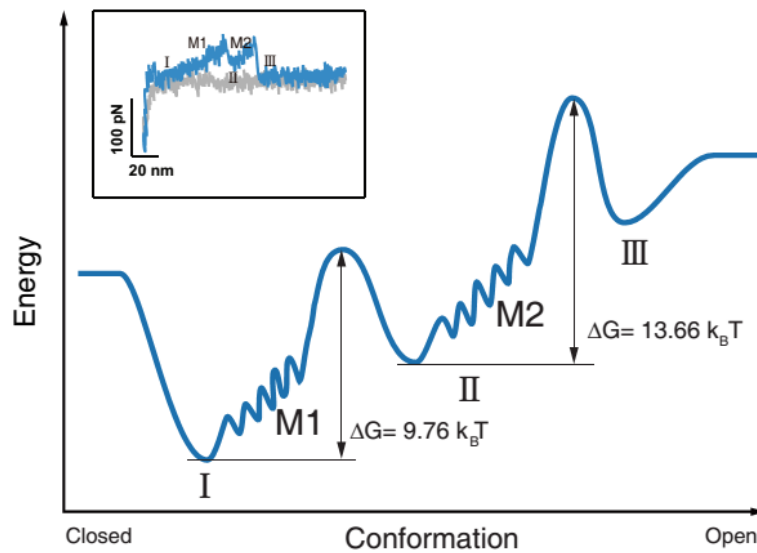

**Figure S6 Multiple kinetic intermediates between the closed and open conformations of the CD3 $\epsilon$  cytoplasmic domain.** (A) Four regions of CD3 $\epsilon$  cytoplasmic domain. (B) The multiple conformations of the CD3 $\epsilon$  cytoplasmic domain are categorized into three stable states (I, II, III) and two potential transient states (M1 and M2): State I, all four regions of CD3 $\epsilon$  cytoplasmic domain are on the membrane; State II, both the C-terminal region and the secondary lipid-binding site are off the membrane whereas the linker and the major lipid-binding site are on the membrane; State III, all four regions are off the membrane. In between State I and II, there might be a group of transient intermediates, together designated as State Mixture 1 (M1), having a conformational state at which the two lipid-binding sites and the linker are associated with the membrane but the C-terminal region is heterogeneously dissociated from the membrane. In between State II and III, there might be another group of transient intermediates, together designated as State Mixture 2 (M2), having a conformational state at which the C-terminal region and the secondary lipid-binding site are dissociated from the membrane while the major lipid-binding site is still associated with the membrane, along with the heterogeneous dissociation of the linker from the membrane. (C) Free energy landscape illustrating the dynamic process of the closed-to-open conformational transition of the CD3 $\epsilon$  cytoplasmic domain.
